# Supplementary material for: Drought stress resistance indicators of chickpea varieties grown under deficit irrigation conditions
Source: PeerJ. 2023 Mar 10;11:e14818. doi: 10.7717/peerj.14818 (PMC10010177; doi:10.7717/peerj.14818)
Supplement: Supplemental Information 1 — observations in the field include all the buds that need to be taken during the period from planting to harvest. [file peerj-11-14818-s001.xlsx]

## Sheet: Sayfa1
Irrigation	TEK	Genotip	Yield	CWSI	CC	Irrigation	Eta	WUE	Number of nodules	Plant root distribution
I100	1	İnci	2571	0.2	44.73	103	418	0.6	11.3	8.25
I100	2	İnci	2539	0.19	43.72	103	418	0.6	11.2	8.26
I100	3	İnci	2589	0.19	44.72	103	418	0.59	10.96	8.29
I100	1	Hasanbey	2413	0.23	43.51	103	418	0.57	9.8	7.72
I100	2	Hasanbey	2419	0.24	43.52	103	418	0.57	9.88	7.75
I100	3	Hasanbey	2439	0.23	43.53	103	418	0.57	9.78	7.79
I100	1	Seçkin	2316	0.27	42.01	103	418	0.56	9.66	6.72
I100	2	Seçkin	2329	0.25	42.32	103	418	0.53	9.76	6.99
I100	3	Seçkin	2339	0.28	42.03	103	418	0.55	9.56	6.89
I50	1	İnci	2289	0.4	36.18	51.5	366.5	0.65	9.2	5.25
I50	2	İnci	2279	0.41	36.33	51.5	366.5	0.66	9.11	5.26
I50	3	İnci	2261	0.43	36.64	51.5	366.5	0.66	9.1	5.29
I50	1	Hasanbey	2239	0.45	36.11	51.5	366.5	0.61	8.64	5.11
I50	2	Hasanbey	2249	0.46	36.14	51.5	366.5	0.61	8.66	5.12
I50	3	Hasanbey	2241	0.47	36.13	51.5	366.5	0.61	8.69	5.13
I50	1	Seçkin	2041	0.49	35.14	51.5	366.5	0.54	7.56	5.01
I50	2	Seçkin	2022	0.48	35.27	51.5	366.5	0.6	7.59	5.03
I50	3	Seçkin	2063	0.49	35.33	51.5	366.5	0.6	8.23	5.09
I0	1	İnci	1997	0.51	33.92		315	0.63	7.43	4.21
I0	2	İnci	1986	0.5	33.28		315	0.64	7.45	4.23
I0	3	İnci	1969	0.5	33.61		315	0.63	7.66	4.9
I0	1	Hasanbey	1890	0.55	33.15		315	0.6	6.87	4.11
I0	2	Hasanbey	1896	0.56	32.29		315	0.6	6.88	4.12
I0	3	Hasanbey	1894	0.54	33.11		315	0.6	6.89	4.13
I0	1	Seçkin	1798	0.57	32.49		315	0.57	6.49	4.09
I0	2	Seçkin	1774	0.59	33.09		315	0.56	6.45	4.09
I0	3	Seçkin	1779	0.58	33.06		315	0.56	6.39	4.08
